# Supplementary material for: In-depth proteomics analysis of sentinel lymph nodes from individuals with endometrial cancer
Source: PubMed Central journal article supplement — Cell Rep Med. 2021 Jun 15;2(6):100318. doi: 10.1016/j.xcrm.2021.100318 (PMC8233695; doi:10.1016/j.xcrm.2021.100318), 2021-06-15
Supplement: mmc1.pdf [file mmc1.pdf]

**Cell Reports Medicine, Volume 2**

**Supplemental information**

**In-depth proteomics analysis  
of sentinel lymph nodes from individuals  
with endometrial cancer**

**Soulaimane Aboulouard, Maxence Wisztorski, Marie Duhamel, Philippe Saudemont, Tristan Cardon, Fabrice Narducci, Anne-Sophie Lemaire, Firas Kobeissy, Eric Leblanc, Isabelle Fournier, and Michel Salzet**

SUPPLEMENTAL FIGURES

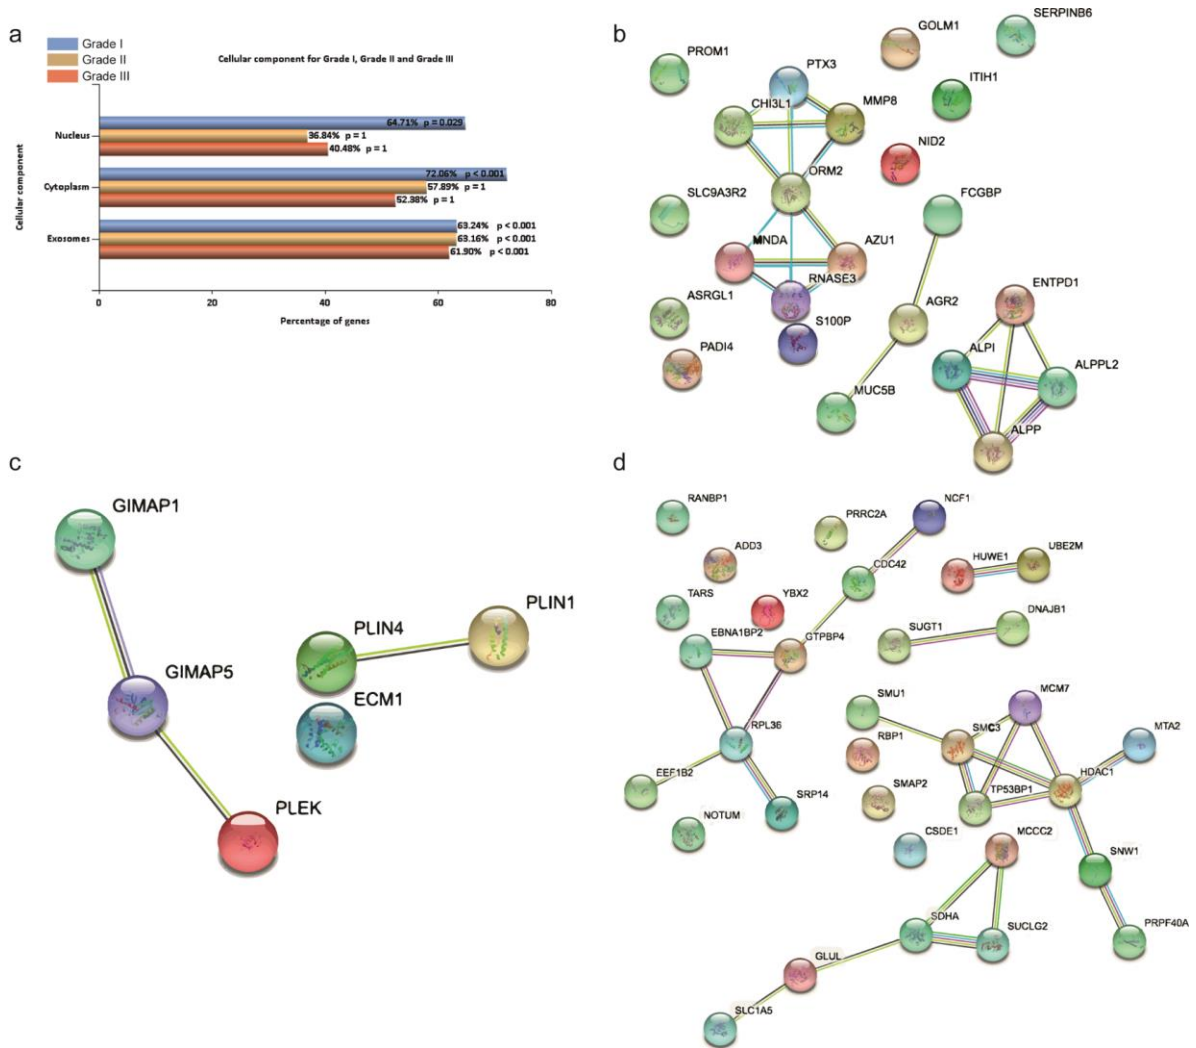

**Figure S1: Sentinel lymph node proteomic analysis, related to Figure 1B.** a) Funrich analyses of the specific proteins identified in different grades of sentinel nodes, string analyses of specific proteins identified in sentinel node b) Grade I, c) Grade II, d) Grade III.

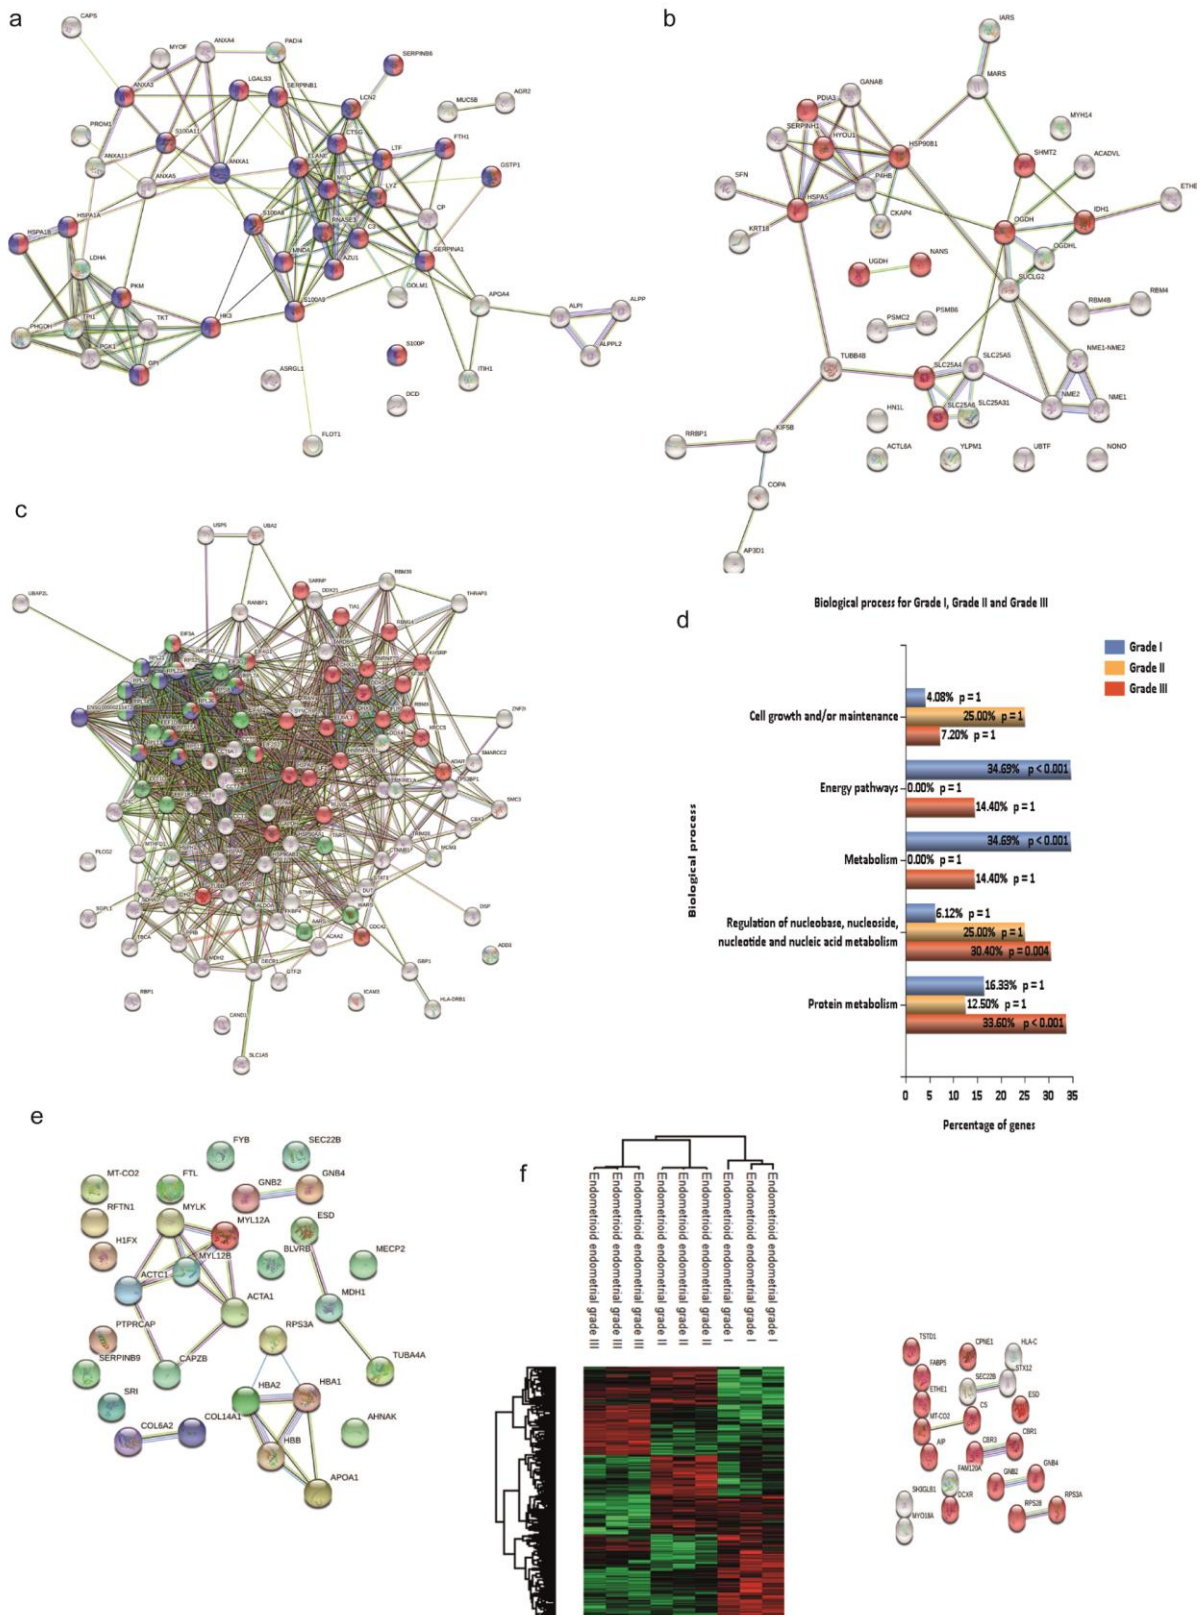

**Figure S2: Analysis of heatmap clusters from SLN and EC, related to Figure 2.** String analyses of over-expressed proteins identified in a) Cluster 1 of the Hierarchical clustering of the most variable proteins between healthy tissues and sentinel node grade I-III, b) Cluster 2, c) Cluster 3 and d) Funrich biological processes analyses of the 3 clusters, e) string analyses of Cluster 4 corresponding to proteins which are more represented in the normal sentinel node, f) Hierarchical clustering of the most variable proteins between healthy tissues and endometrial carcinoma grade I-III (n=3 for each category, ANOVA with permutation-based FDR < 0.01), inset string analysis of proteins have been identified in common between Grade II and Grade III.

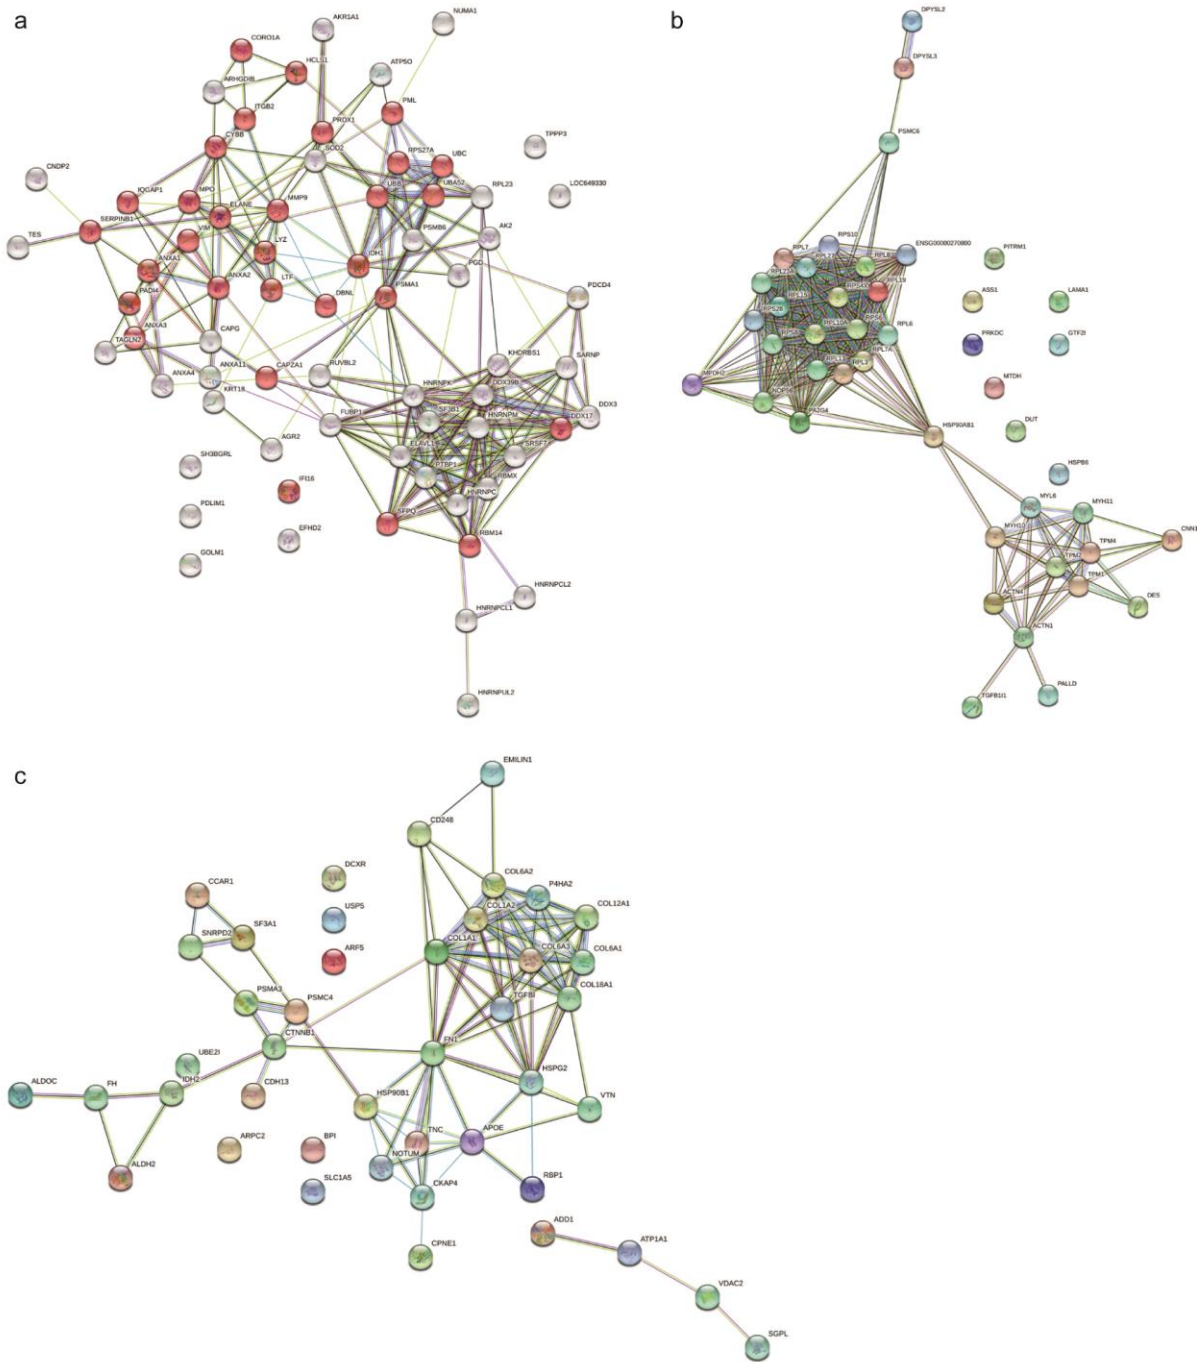

**Figure S3: Analysis of cluster over-expressed from EC heatmap, related to Figure 4d.** String analyses of over-expressed proteins identified in a) Cluster 1 of the Hierarchical clustering of the most variable proteins between healthy tissues and endometrial carcinoma grade I-III, b) Cluster 2, c) Cluster 3.

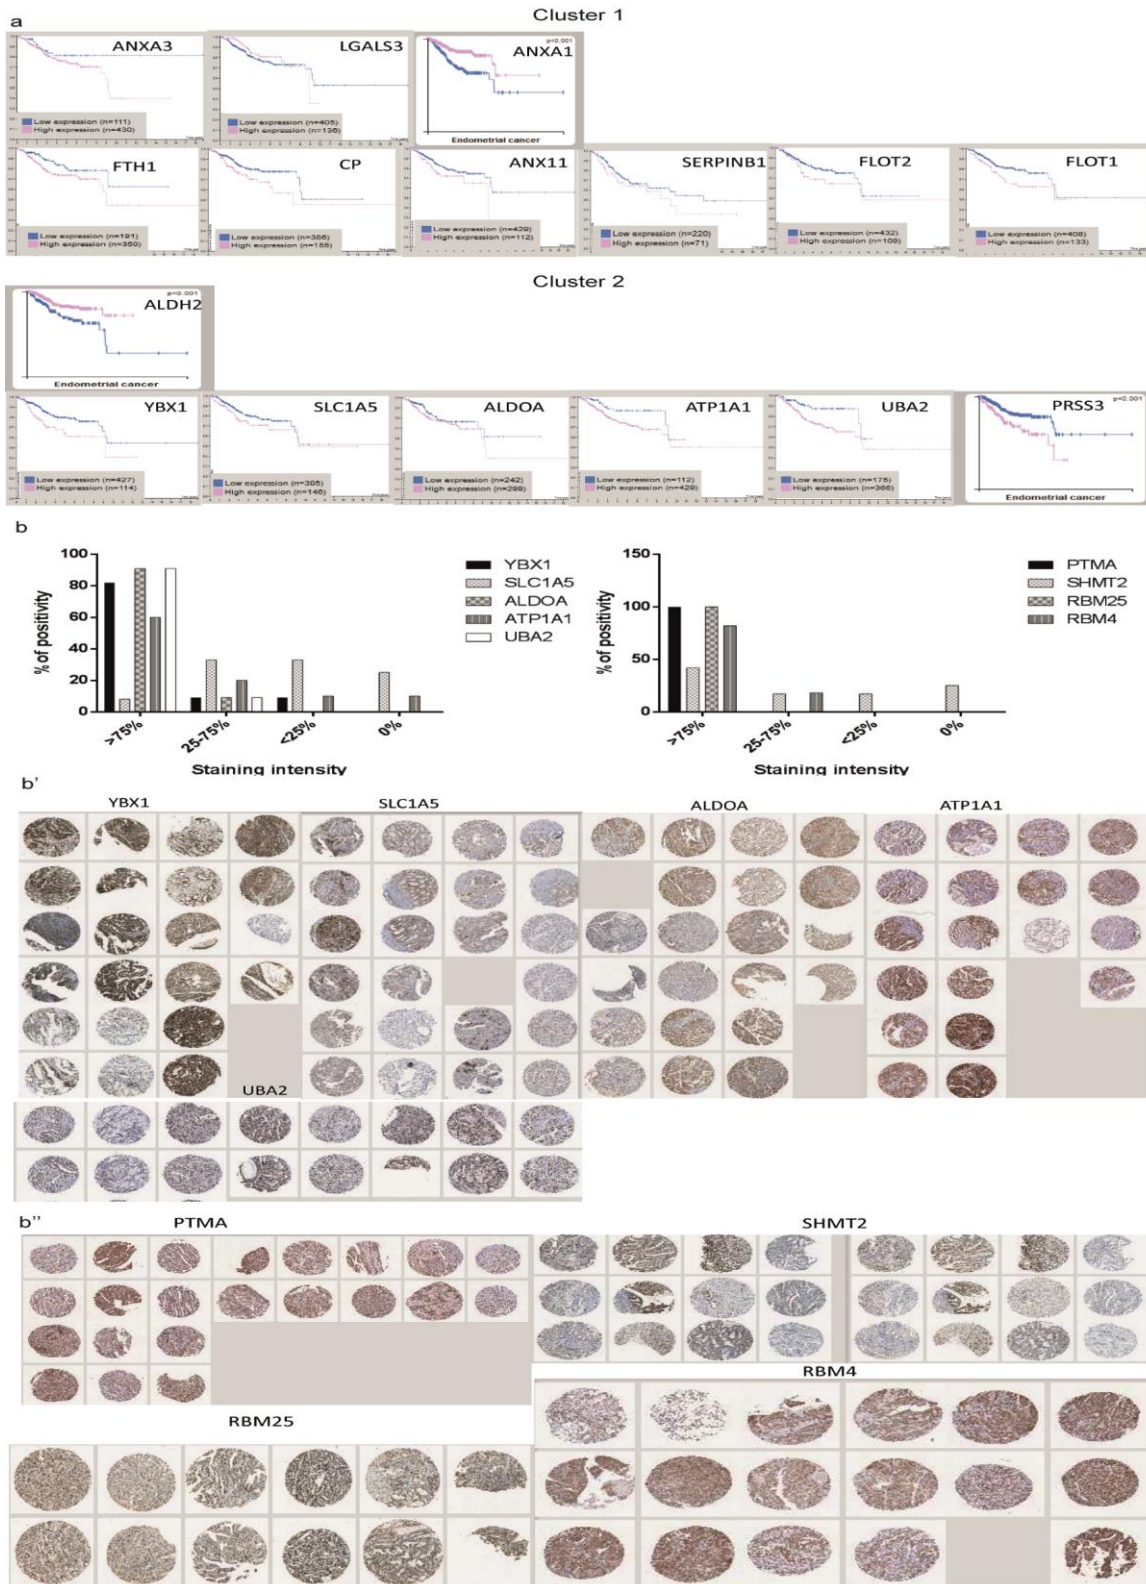

**Figure S4: TCGA analysis of 2 the clusters from heatmap of all samples, related to Figure 5a. a)** Overall survival curve obtained from TCGA and pathological atlas of proteins identified in Cluster 1, Cluster 2 from heatmap analysis performed on the 24 samples (sentinel node, endometrial carcinoma, and healthy tissues) after ANOVA with an FDR of 0.01 (**Figure 5a**), **b)** quantification of the IHC of markers in **b'** and **b''**, **b')** TMA analyses by IHC of specific markers detected in endometrial carcinoma and considered by TCGA as bad prognosis markers, **b'')** TMA analyses by IHC of markers detected in both sentinel nodes grade I, II and II as well as in grades I, II, III of endometrial cancer grades after correlation matrices studies.

**SUPPLEMENTAL TABLES**

**Table S1: Information concerning patients and type of tumors identified by the pathologist, related to Figure 1A.**

| <b>CASE</b>      | <b>AGE</b> | <b>BMI</b> | <b>WHO</b> | <b>POPULATION</b>    | <b>EVOLUTION</b>                    | <b>TREATMENT</b>                                                  | <b>SAMPLES</b>  | <b>TISSUE TYPE</b>                                   |
|------------------|------------|------------|------------|----------------------|-------------------------------------|-------------------------------------------------------------------|-----------------|------------------------------------------------------|
| <b>1601533BA</b> | 59         | 35         | 0          | Caucasian population | No evidence of disease at 48 months | surgery, extended radiotherapy, and brachytherapy                 | 1,2, 3<br>4,5,6 | Endometrial Cancer Grade I<br><br>Heathy endometrial |
| <b>1601533AG</b> | 59         | 35         | 0          | Caucasian population | No evidence of disease at 48 months | surgery, extended radiotherapy, and brachytherapy                 | 1, 2, 3         | Sentinel Lymph Node Grade I                          |
| <b>1700689AK</b> | 67         | 37.5       | 1          | Caucasian population | No evidence of disease at 28 months | surgery, pelvic radiotherapy, and brachytherapy then chemotherapy | 1, 2, 3         | Endometrial Cancer Grade II                          |
| <b>1700689BH</b> | 67         | 37.5       | 1          | Caucasian population | No evidence of disease at 28 months | surgery, pelvic radiotherapy, and brachytherapy then chemotherapy | 1, 2, 3         | Sentinel Lymph Node Grade II                         |
| <b>1702767AG</b> | 70         | 31.3       | 0          | Caucasian population | dead during chemotherapy            | surgery, chemotherapy                                             | 1, 2, 3         | Endometrial Cancer Grade III                         |
| <b>1702767AA</b> | 70         | 31.3       | 0          | Caucasian population | dead during chemotherapy            | surgery, chemotherapy                                             | 1, 2, 3         | Sentinel Lymph Node Grade III                        |
| <b>1702767BH</b> | 70         | 31.3       | 0          | Caucasian population | dead during chemotherapy            | surgery, chemotherapy                                             | 1, 2, 3         | Healthy Sentinel Lymph Node                          |
| <b>1704661AD</b> | 44         | 34.1       | 0          | Caucasian population |                                     | Normal endometrial epithelium                                     | 1, 2, 3         | Heathy endometrial                                   |
| <b>2001811</b>   | 73         | 27.2       | 0          | Caucasian population | No evidence of disease at 4 months  | Surgery, brachytherapy                                            | 1               | Endometrial cancer grade I and associated node       |
| <b>1701714</b>   | 65         | 27         | 0          | Caucasian population | Pulmonary metastasis at 36 months   | Surgery, pelvic radiotherapy, brachytherapy                       | 1               | Endometrial cancer grade II and associated node      |
| <b>1704931</b>   | 71         | 41.3       | 0          | Caucasian population | No evidence of disease at 29 months | Surgery, pelvic radiotherapy, brachytherapy                       | 1               | Endometrial cancer grade II and associated node      |
| <b>1805814</b>   | 67         | 33.8       | 0          | Caucasian population | No evidence of disease at 18 months | Surgery, pelvic radiotherapy, brachytherapy                       | 1               | Endometrial cancer grade III and associated node     |
| <b>1904162</b>   | 74         | 26.7       | 0          | Caucasian population | No evidence of disease at 14 months | Surgery                                                           | 1               | Endometrial cancer grade II and associated node      |
| <b>1702260</b>   | 60         | 37.9       | 0          | Caucasian population | No evidence of disease at 36 months | Surgery, brachytherapy                                            | 1               | Endometrial cancer grade II and associated node      |
| <b>1902287</b>   | 65         | 32.2       | 0          | Caucasian population | No evidence of disease at 9 months  | Surgery, chemotherapy, pelvic radiotherapy, brachytherapy         | 1               | Endometrial cancer grade II and associated node      |

**Table S5: Identified proteins in Clusters 1 & 2 which represents the proteins in common between SLN Grade I and Endometrial Grade I (Cluster 1) and SLN Grade III and Endometrial Grade III (Cluster 2), related to Figure 5.**

|  | Cluster 1                                                                    |            | Cluster 2 | Cluster 2                                                       |            |
|--|------------------------------------------------------------------------------|------------|-----------|-----------------------------------------------------------------|------------|
|  | Protein Names                                                                | Gene Names |           | Protein Names                                                   | Gene Names |
|  | Ferritin heavy chain; Ferritin heavy chain, N-terminally processed; Ferritin | FTH1       |           | Nuclease-sensitive element-binding protein 1                    | YBX1       |
|  | Ig kappa chain C region                                                      | IGKC       |           | Trypsin-3                                                       | PRSS3      |
|  | Ig alpha-1 chain C region                                                    | IGHA1      |           | Glutamine synthetase                                            | GLUL       |
|  | Inter-alpha-trypsin inhibitor heavy chain H1                                 | ITIH1      |           | Sphingosine-1-phosphate lyase 1                                 | SGPL1      |
|  | Ceruloplasmin                                                                | CP         |           | Catenin beta-1                                                  | CTNNB1     |
|  | Complement C3                                                                | C3         |           | Amino acid transporter; Neutral amino acid transporter B(0)     | SLC1A5     |
|  | Cytochrome b-245 heavy chain                                                 | CYBB       |           | Palmitoleoyl-protein carboxylesterase NOTUM                     | NOTUM      |
|  | Lysozyme C;Lysozyme                                                          | LYZ        |           | Aldehyde dehydrogenase, mitochondrial                           | ALDH2      |
|  | Annexin A11                                                                  | ANXA11     |           | Ubiquitin carboxyl-terminal hydrolase 5                         | USP5       |
|  | Leukocyte elastase inhibitor                                                 | SERPINB1   |           | Kinesin-1 heavy chain                                           | KIF5B      |
|  | Erythrocyte band 7 integral membrane protein                                 | STOM       |           | Fructose-bisphosphate aldolase;Fructose-bisphosphate aldolase A | ALDOA      |
|  | Annexin A1;Annexin                                                           | ANXA1      |           | Sodium/potassium-transporting ATPase subunit alpha-1            | ATP1A1     |
|  | Catalase                                                                     | CAT        |           | SUMO-activating enzyme subunit 2                                | UBA2       |
|  | Flotillin-2                                                                  | FLOT2      |           | Core histone macro-H2A.2                                        | H2AFY2     |
|  | Superoxide dismutase                                                         | SOD2       |           | Tubulin polymerization-promoting protein family member 3        | TPPP3      |
|  | Integrin beta                                                                | ITGB2      |           |                                                                 |            |
|  | Flotillin-1                                                                  | FLOT1      |           |                                                                 |            |
|  | Azurocidin                                                                   | AZU1       |           |                                                                 |            |
|  | Eosinophil cationic protein                                                  | RNASE3     |           |                                                                 |            |
|  | Neutrophil gelatinase-associated lipocalin                                   | LCN2       |           |                                                                 |            |
|  | Intestinal-type alkaline phosphatase                                         | ALPP       |           |                                                                 |            |
